# Supplementary material for: Effect of a π-linker of push–pull D–π–A donor molecules on the performance of organic photodetectors
Source: Royal Society of Chemistry journal article supplement (doi:10.1039/d0tc02168g), 2020-01-01
Supplement: d0tc02168g1.pdf [file d0tc02168g1.pdf]

## Electronic Supplementary Information

# Effect of a $\pi$ -Linker of Push–Pull D– $\pi$ –A Donor Molecules on the Performance of Organic Photodetectors

*Hong Chul Lim,<sup>a</sup> Min-Soo Choi,<sup>b</sup> Sangmin Chae,<sup>c</sup> Hyo Jung Kim,<sup>c</sup> Jang-Joo Kim,<sup>b\*</sup> and Jong-In  
Hong<sup>a\*</sup>*

<sup>a</sup> Department of Chemistry, Seoul National University, Seoul 08826, Republic of Korea

<sup>b</sup> Department of Materials Science and Engineering, Seoul National University, Seoul 08826,  
Republic of Korea

<sup>c</sup> Department of Organic Material Science and Engineering, Pusan National University, Busan  
46241, Republic of Korea

E-mail: jjkim@snu.ac.kr; jihong@snu.ac.kr

## Syntheses and characterizations:

### Reagents and materials

All the chemical reagents were used without further purification. Tetrakis(triphenylphosphine)palladium(0) (Pd(PPh<sub>3</sub>)<sub>4</sub>), tris(dibenzylideneacetone)dipalladium(0) (Pd(dba)<sub>3</sub>), 2,5-dibromothiophene, 2-(3-hexylthiophen-2-yl)-4,4,5,5-tetramethyl-1,3,2-dioxaborolane, 2-(3-oxo-2,3-dihydro-1H-inden-1-ylidene)malononitrile were purchased from Toyko Chemical Industry (TCI). N-bromosuccinimide (NBS), tetrabutylammonium hexafluorophosphate (TBAPF<sub>6</sub>), phosphorus(V) oxychloride (POCl<sub>3</sub>), 4-bromo-N,N-diphenylaniline, potassium carbonate (K<sub>2</sub>CO<sub>3</sub>), sodium bicarbonate (NaHCO<sub>3</sub>), and N,N'-dimethylformamide (DMF) were purchased from Sigma-Aldrich and SAMCHUN. Fullerene-C<sub>60</sub> (C<sub>60</sub>, 99.95%) was purchased from SES Research.

### Synthesis of Donor Molecules

Dithieno[3,2-b:2',3'-d]thiophene (compound 4) was prepared according to the literature procedure.<sup>1</sup>

#### 2-bromodithieno[3,2-b:2',3'-d]thiophene (5)

To a solution of compound 4 (0.8 g, 4.1 mmol) in CHCl<sub>3</sub> (20 ml) cooled in an ice bath was slowly added acetic acid (20 ml). The reaction mixture was treated with NBS (0.881 g, 4.9 mmol) and stirred for 10 h. The reaction mixture was treated with aqueous solution of NaOH (25 ml, 1 M), stirred in an ice bath for 2 h, then concentrated under vacuum, and extracted with dichloromethane. The organic phase was washed with water and brine, and dried over anhydrous MgSO<sub>4</sub>. All volatiles were evaporated and the crude product was purified by column chromatography on silica gel using dichloromethane to give a yellow solid product (yield: 0.95 g, 85%). <sup>1</sup>H NMR (300 MHz, acetone-*d*<sub>6</sub>, ppm) δ: 7.67 (s, 1H), 7.65 (d, 1H, 4.3 Hz), 7.50 (d, 1H, 5.2 Hz).

#### 6-bromodithieno[3,2-b:2',3'-d]thiophene-2-carbaldehyde (6)

DMF (0.85 ml, 11.6 mmol) and POCl<sub>3</sub> (0.55 ml, 5.8 mmol) were added to a solution of compound 5 (0.8g, 2.9 mmol) in distilled dichloromethane (25 ml) cooled in an ice bath. The reaction mixture was stirred at room temperature for 2 h and then heated at 70 °C for 12 h. The reaction mixture was cooled to room temperature, treated with aqueous sodium acetate (20 ml, 2 M), and stirred for 2 h. Volatiles were evaporated under vacuum and the resulting residue was extracted with dichloromethane. The organic phase was washed with water and brine, and dried over anhydrous Na<sub>2</sub>SO<sub>4</sub>. The crude product was purified by column chromatography on silica gel using dichloromethane and hexane (1:4 v/v) to give a yellow-red solid product (yield: 0.66 g, 75 %). <sup>1</sup>H NMR (300 MHz, acetone-*d*<sub>6</sub>, ppm) δ: 10.06 (s, 1H), 8.40 (s, 1H), 7.75 (s, 1H).

### ***N,N*-diphenyl-4-(4,4,5,5-tetramethyl-1,3,2-dioxaborolan-2-yl)aniline (7)**

*n*-Butyllithium (8.5 ml, 1.6 M in hexane) was slowly added to a solution of 4-bromo-*N,N*-diphenylaniline (2g, 6.17 mmol) in distilled THF (40 ml) under a nitrogen atmosphere cooled at -70 °C (dry ice/isopropanol). After 90 min, 2-isopropoxy-4,4,5,5-tetramethyl-1,3,2-dioxaborolane (2.53 g, 13.57 mmol) was added dropwise via syringe. The reaction mixture was stirred overnight and then treated with water (20 ml). The resulting mixture was extracted with dichloromethane. The organic phase was washed with water and brine, and dried over anhydrous MgSO<sub>4</sub>. Volatiles were evaporated and the resulting residue was purified by column chromatography on silica gel using dichloromethane and hexane (1:5 v/v) to give a white solid product (yield: 1.57 g, 79 %). <sup>1</sup>H NMR (300 MHz, acetone-*d*<sub>6</sub>, ppm) δ: 7.63 (d, 2H, 8.4 Hz), 7.34 (t, 4H, 15.6 Hz), 7.11 (m, 6H), 6.98 (d, 2H, 8.4 Hz), 1.33 (s, 12H).

### **6-(4-(diphenylamino)phenyl)dithieno[3,2-*b*:2',3'-*d*]thiophene-2-carbaldehyde (8)**

A mixture of compound **7** (0.66 g, 2.2 mmol), compound **6** (0.89 g, 2.4 mmol), Pd(PPh<sub>3</sub>)<sub>4</sub> (0.083 g, 0.07 mmol) and NaHCO<sub>3</sub> (2.74 g, 32.7 mmol) in THF and H<sub>2</sub>O (30 ml/10 ml, 3:1 v/v) was refluxed for 48 h. The reaction mixture was concentrated under vacuum and was extracted with dichloromethane. The organic phase was washed with water and brine, and dried over anhydrous MgSO<sub>4</sub>. Volatiles were evaporated and the residue was purified by column chromatography on silica gel using dichloromethane and hexane (2:1 v/v) to give yellow solid product (yield: 0.68 g, 67 %). <sup>1</sup>H NMR (300 MHz, acetone-*d*<sub>6</sub>, ppm) δ: 10.04 (s, 1H), 8.38 (s, 1H), 7.84 (s, 1H), 7.69 (d, 2H, 8.7 Hz), 7.37 (t, 4H, 7.8 Hz), 7.16 (d, 6H, 8.3 Hz), 7.10 (t, 3H, 7.0 Hz).

### **2-((6-(4-(diphenylamino)phenyl)dithieno[3,2-*b*:2',3'-*d*]thiophen-2-yl)methylene)-1H-indene-1,3(2H)-dione (H1)**

To a solution of compound **8** (0.60 g, 1.28 mmol) in THF (20 ml) at 65 °C was added dropwise 1,3-indandione (0.215 g, 1.47 mmol) in THF (7 ml). The reaction mixture was stirred at the same temperature for 60 h, cooled to room temperature and concentrated under vacuum. The crude product was purified by column chromatography on silica gel using dichloromethane to give dark pink solid product, which was treated with dichloromethane and ethanol to isolate the product as precipitates. The precipitate was purified further by temperature gradient sublimation under reduced pressure (10<sup>-3</sup> torr) to give dark green solid product (yield: 0.27 g, 35%). <sup>1</sup>H NMR (300 MHz, DMSO-*d*<sub>6</sub>, ppm) δ: 8.63 (s, 1H), 8.13 (s, 1H), 7.93 (m, 5H), 7.66 (d, 2H), 7.37 (t, 4H, 7.7 Hz), 7.16 (s, 1H), 7.11 (d, 5H, 7.9 Hz), 7.01 (d, 2H, 8.5 Hz). HRMS (FAB) *m/z*: calcd C<sub>36</sub>H<sub>21</sub>NO<sub>2</sub>S<sub>3</sub> 595.07, [M+H]<sup>+</sup>: observed 595.07. Elemental analysis calc.: C, 72.58; H, 3.55; N, 2.35; O, 5.37; S, 16.14; found: C, 72.68; H, 3.47; N, 2.32; O, 5.37; S, 16.23

### **2,2':5',2''-terthiophene (9)**

A mixture of 2,5-dibromothiophene (1 g, 4.13 mmol), thiophen-2-ylboronic acid (1.59 g, 12.4 mmol), Pd(PPh<sub>3</sub>)<sub>4</sub> (0.29 mg, 0.25 mmol), and K<sub>2</sub>CO<sub>3</sub> (5 ml, 2M) in THF and methanol (20:4 ml v/v) was heated at 100 °C for 36 h. Then the reaction mixture was cooled to room temperature, then concentrated under vacuum, and the resulting mixture was extracted with dichloromethane. The organic phase was washed with water and brine, and dried over anhydrous MgSO<sub>4</sub>. Volatiles were evaporated and the crude product was purified by column chromatography on silica gel using hexane to give yellow solid product (yield: 0.70 g, 70%). <sup>1</sup>H NMR (300 MHz, acetone-*d*<sub>6</sub>, ppm) δ: 7.46 (dd, 2H, 0.9, 5.1 Hz), 7.32 (dd, 2H, 0.9, 3.5 Hz), 7.23 (s, 2H), 7.11 (dd, 2H, 3.7, 5.0 Hz).

### **5-bromo-2,2':5',2''-terthiophene (10)**

To a solution of compound **9** (0.7 g, 2.82 mmol) in CHCl<sub>3</sub> (20 ml) cooled in an ice bath was slowly added acetic acid (20 ml). The reaction mixture was treated with NBS (0.553 g, 3.1 mmol) and stirred overnight. The reaction mixture was treated with saturated aqueous NaHCO<sub>3</sub> (20 ml), stirred at room temperature for 2 h, then concentrated under vacuum, and extracted with dichloromethane. The organic phase was washed with water and brine, and dried over anhydrous MgSO<sub>4</sub>. All volatiles were evaporated and the crude product was purified by column chromatography on silica gel using hexane to give yellow solid product (yield: 0.70 g, 76%). <sup>1</sup>H NMR (300 MHz, acetone-*d*<sub>6</sub>, ppm) δ: 7.47 (t, 1H, 5.3 Hz), 7.33 (t, 1H, 3.5 Hz), 7.24 (s, 2H), 7.17 (m, 2H), 7.11 (m, 1H).

### **5''-bromo-[2,2':5',2''-terthiophene]-5-carbaldehyde (11)**

DMF (0.66 ml, 8.59 mmol) and POCl<sub>3</sub> (0.41 ml, 4.30 mmol) were added to a solution of compound **10** (0.7 g, 2.15 mmol) in distilled dichloromethane (20 ml) cooled in an ice bath. The reaction mixture was stirred at room temperature for 2 h and then heated at 70 °C for 12 h. The reaction mixture was cooled to room temperature, treated with sodium acetate (20 ml, 2 M), and stirred for 2 h. Volatiles were evaporated under vacuum and the resulting residue was extracted with dichloromethane. The organic phase was washed with water and brine, and dried over anhydrous Na<sub>2</sub>SO<sub>4</sub>. The crude product was purified by column chromatography on silica gel using dichloromethane and hexane (2:1 v/v) to give orange solid product (yield: 0.58 g, 76 %). <sup>1</sup>H NMR (300 MHz, acetone-*d*<sub>6</sub>, ppm) δ: 9.95 (s, 1H), 7.96 (d, 1H, 4.0 Hz), 7.52 (d, 2H, 3.1 Hz), 7.33 (d, 1H, 3.9 Hz), 7.22 (dd, 2H, 3.9, 7.3 Hz).

### **5''-(4-(diphenylamino)phenyl)-[2,2':5',2''-terthiophene]-5-carbaldehyde (12)**

A mixture of compound **7** (0.71 g, 2.46 mmol), compound **11** (0.58 g, 1.64 mmol), Pd(PPh<sub>3</sub>)<sub>4</sub> (0.057 g, 0.049 mmol) and NaHCO<sub>3</sub> (2.07 g, 24.6 mmol) in THF and H<sub>2</sub>O (30 ml/10 ml, 3:1 v/v) was refluxed for 48 h. The reaction mixture was concentrated under vacuum and was extracted with dichloromethane. The organic phase was washed with water and brine, and dried over

anhydrous MgSO<sub>4</sub>. Volatiles were evaporated and the residue was purified by column chromatography on silica gel using dichloromethane and hexane (2:1 v/v) to give orange-red solid product (yield: 0.72 g, 84 %). <sup>1</sup>H NMR (300 MHz, acetone-*d*<sub>6</sub>, ppm) δ: 9.95 (s, 1H), 7.96 (d, 1H, 3.9 Hz), 7.63 (d, 2H, 8.6 Hz), 7.52 (dd, 2H, 3.9, 6.7 Hz), 7.39 (d, 3H, 3.7 Hz), 7.34 (t, 4H, 3.9 Hz), 7.13 (d, 6H, 7.8 Hz), 7.07 (d, 2H, 8.7 Hz).

### **2-((5''-(4-(diphenylamino)phenyl)-[2,2':5',2''-terthiophen]-5-yl)methylene)-1H-indene-1,3(2H)-dione (H2)**

To a solution of compound **12** (0.72 g, 1.4 mmol) in THF (25 ml) at 65 °C was added dropwise 1,3-indandione (0.235 g, 1.61 mmol) in THF (7 ml). The reaction mixture was stirred at the same temperature for 60 h, cooled to RT and concentrated under vacuum. The crude product was purified by column chromatography on silica gel using dichloromethane to give dark pink solid product, which was treated with dichloromethane and ethanol to isolate the product as precipitates. The precipitate was purified further by temperature gradient sublimation under reduced pressure (10<sup>-3</sup> torr) to give dark green solid product (yield: 0.25 g, 28%). <sup>1</sup>H NMR (300 MHz, DMSO-*d*<sub>6</sub>, ppm) δ: 8.23 (d, 1H, 4.1 Hz), 8.08 (s, 1H), 7.95 (s, 4H), 7.70 (d, 1H, 3.9 Hz), 7.67 (d, 1H, 4.0 Hz), 7.61 (d, 2H, 8.6 Hz) 7.47 (dd, 3H, 3.8, 11.1 Hz), 7.36 (t, 4H, 7.7 Hz), 7.10 (t, 6H, 9.2 Hz), 7.00 (d, 2H, 8.5 Hz). HRMS (FAB) m/z: calcd C<sub>40</sub>H<sub>25</sub>NO<sub>2</sub>S<sub>3</sub> 647.83, [M+H]<sup>+</sup>: observed 647.10. Elemental analysis calc.: C, 74.16; H, 3.89; N, 2.16; O, 4.94; S, 14.85; found: C, 74.18; H, 3.78; N, 2.09; O, 4.98; S, 14.93

### **N,N-diphenyl-4-(thiophen-2-yl)aniline (13)**

A mixture of (4-(diphenylamino)phenyl)boronic acid (2.13 g, 7.4 mmol), 2-bromothiophene (1.0 g, 6.1 mmol), Pd(PPh<sub>3</sub>)<sub>4</sub> (0.35 g, 0.31 mmol) and K<sub>2</sub>CO<sub>3</sub> (15 ml, 2M) in THF (45 ml) was refluxed for 24 h. The reaction mixture was concentrated under vacuum and was extracted with dichloromethane. The organic phase was washed with water and brine, and dried over anhydrous MgSO<sub>4</sub>. Volatiles were evaporated and the residue was purified by column chromatography on silica gel using hexane to give white solid product (yield: 1.43 g, 71 %). <sup>1</sup>H NMR (300 MHz, acetone-*d*<sub>6</sub>, ppm) δ: 7.59 (d, 2H, 8.6 Hz), 7.39 (t, 2H, 4.6 Hz), 7.34 (t, 4H, 7.9 Hz), 7.07 (m, 9H)

### **5-(4-(diphenylamino)phenyl)thiophene-2-carbaldehyde (14)**

DMF (1.35 ml, 17.5 mmol) and POCl<sub>3</sub> (0.83 ml, 8.74 mmol) were added to a solution of compound **13** (1.43 g, 4.37 mmol) in distilled dichloromethane (25 ml) cooled in an ice bath. The reaction mixture was stirred at RT for 2 h and then heated at 70 °C for 12 h. The reaction mixture was cooled to room temperature, treated with sodium acetate (25 ml, 2 M), and stirred for 2 h. Volatiles were evaporated under vacuum and the resulting residue was extracted with dichloromethane. The organic phase was washed with water and brine, and dried over anhydrous Na<sub>2</sub>SO<sub>4</sub>. The crude product was purified by column chromatography on silica gel using dichloromethane and hexane

(2:1 v/v) to give yellow-green solid product (yield: 0.58 g, 76 %).  $^1\text{H}$  NMR (300 MHz, acetone- $d_6$ , ppm)  $\delta$ : 9.92 (s, 1H), 7.95 (d, 1H, 3.9 Hz), 7.70 (dd, 2H, 1.9, 6.8 Hz), 7.57 (d, 1H, 4.0 Hz), 7.37 (dd, 4H, 5.4, 10.3 Hz), 7.14 (dd, 6H, 6.3, 7.6 Hz), 7.05 (d, 2H, 6.9 Hz)

### 2-((5-(4-(diphenylamino)phenyl)thiophen-2-yl)methylene)-1H-indene-1,3(2H)-dione (H3)

To a solution of compound **14** (0.51 g, 1.4 mmol) in THF (25 ml) at 65 °C was added dropwise 1,3-indandione (0.252 g, 1.72 mmol) in THF (7 ml). The reaction mixture was stirred at the same temperature for 60 h, cooled to RT and concentrated under vacuum. The crude product was purified by column chromatography on silica gel using dichloromethane to give pink-red solid product, which was treated with dichloromethane and ethanol to isolate the product as precipitates. The precipitate was purified further by temperature gradient sublimation under reduced pressure ( $10^{-3}$  torr) to give dark pink solid product (yield: 0.29 g, 37%).  $^1\text{H}$  NMR (300 MHz, DMSO- $d_6$ , ppm)  $\delta$ : 8.25 (d, 1H, 4.1 Hz), 8.04 (s, 1H), 7.93 (m, 4H), 7.76 (d, 2H, 8.7 Hz), 7.69 (d, 1H, 4.1 Hz), 7.39 (t, 4H, 7.8 Hz), 7.15 (m, 6H), 7.00 (d, 2H, 8.7 Hz). HRMS (FAB)  $m/z$ : calcd  $\text{C}_{32}\text{H}_{21}\text{NO}_2\text{S}$  483.13,  $[\text{M}+\text{H}]^+$ : observed 483.13. Elemental analysis calc.: C, 79.48; H, 4.38; N, 2.90; O, 6.62; S, 6.63; found: C, 79.59; H, 4.25; N, 2.78; O, 6.96; S, 6.42

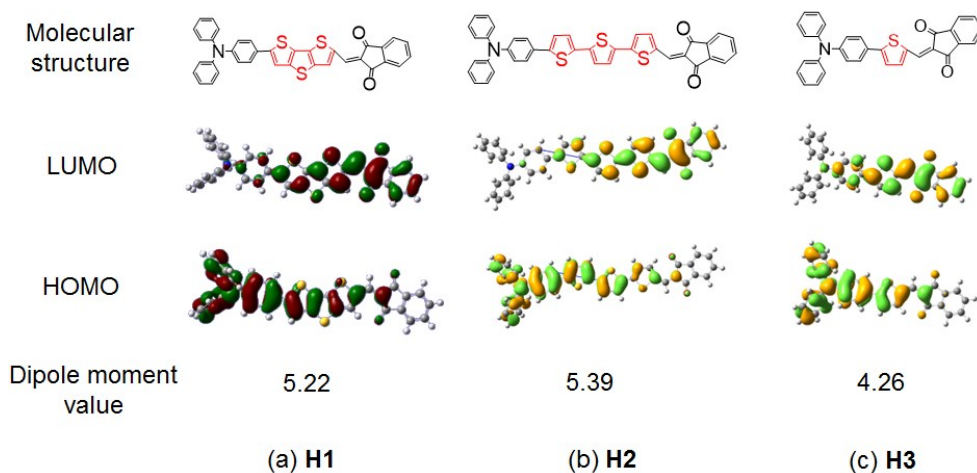

**Fig. S1.** Calculated geometries, orbital density maps, and dipole moment values of (a) **H1**, (b) **H2**, and (c) **H3**.

**Table S1.** Gibbs free energy changes ( $\Delta G^0$ ) for the driving force of electron transfer from donor to  $C_{60}$ .

| Molecules | Reorganization energy ( $\lambda$ ) <sup>a</sup>    | $\lambda_{abs,max}$ (eV) <sup>b</sup> | PES value <sup>c</sup> | EA( $C_{60}$ ) | $\Delta G^0$<br>(PES – EA( $C_{60}$ )) |
|-----------|-----------------------------------------------------|---------------------------------------|------------------------|----------------|----------------------------------------|
|           | $(\lambda_{abs,max} (eV) - \lambda_{flu,max} (eV))$ | transition                            |                        |                |                                        |
| <b>H1</b> | 0.58                                                | 2.96                                  | 3.54                   |                | – 0.96                                 |
| <b>H2</b> | 0.66                                                | 2.90                                  | 3.56                   | 4.5            | – 0.94                                 |
| <b>H3</b> | 0.54                                                | 2.99                                  | 3.53                   |                | – 0.97                                 |

<sup>a</sup> Reorganization energy is the Stokes shift in the optical spectra of thin films. <sup>b</sup>  $\lambda_{abs,max}$  transition is the absorption peak from thin films. <sup>c</sup> PES is  $\lambda_{abs,max}(eV) + Reorganization\ energy (eV)$ .

$$\Delta G^0 = PES_{donor} - EA_{C60} = \lambda_{abs,max}(eV) + reorganization\ energy (\lambda_{abs,max} - \lambda_{flu,max}) (eV) - EA_{C60}$$

Where  $PES_{donor}$  is the lowest potential energy surface of the excited donor and  $EA_{C60}$  is the electron affinity of  $C_{60}$  as an acceptor molecule. The  $PES_{donor}$  values were estimated by the Stokes shift in optical spectra of thin films.<sup>2</sup>

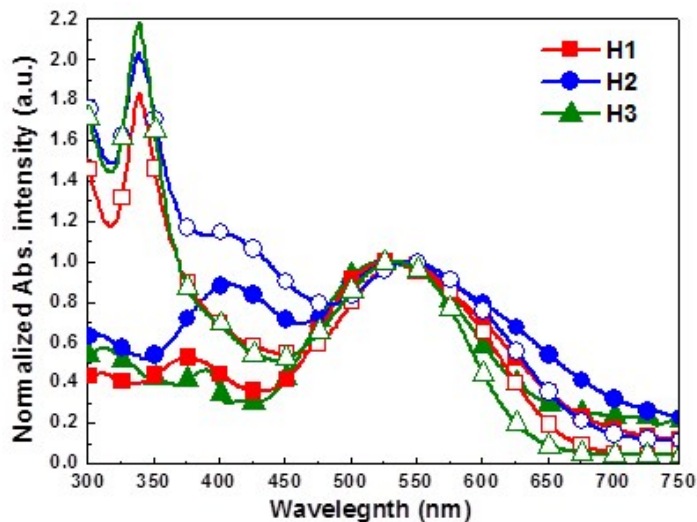

**Fig. S2.** (a) Normalized UV-vis absorption spectra of **H1**, **H2**, and **H3** (filled symbol lines: neat thin films, open symbol lines: donor: $C_{60}$  (1:1) blend thin films) (rectangle: **H1**, circle: **H2**, and triangle: **H3**).

**Table S2.** Crystallographic data of donor molecules (**H1**, **H2**, and **H3**)

| Molecule                            | <b>H1</b>                                                      | <b>H2</b>                                                      | <b>H3</b>                                                      |
|-------------------------------------|----------------------------------------------------------------|----------------------------------------------------------------|----------------------------------------------------------------|
| Empirical formula                   | C <sub>36</sub> H <sub>21</sub> NO <sub>2</sub> S <sub>3</sub> | C <sub>40</sub> H <sub>25</sub> NO <sub>2</sub> S <sub>3</sub> | C <sub>32</sub> H <sub>21</sub> NO <sub>2</sub> S <sub>1</sub> |
| Formula weight                      | 595.72                                                         | 647.79                                                         | 483.56                                                         |
| Crystal system                      | Triclinic                                                      | Triclinic                                                      | Triclinic                                                      |
| Space group                         | P-1                                                            | P-1                                                            | P-1                                                            |
| a (Å)                               | 8.4093(5)                                                      | 8.2841(5)                                                      | 10.3229(9)                                                     |
| b (Å)                               | 12.8870(9)                                                     | 8.8440(6)                                                      | 13.2772(10)                                                    |
| c (Å)                               | 16.3827(11)                                                    | 47.831(2)                                                      | 18.3232(16)                                                    |
| α (°)                               | 112.326(7)                                                     | 86.851(4)                                                      | 83.967(7)                                                      |
| β (°)                               | 95.792(5)                                                      | 88.026(4)                                                      | 74.029(8)                                                      |
| γ (°)                               | 99.968(5)                                                      | 62.183(7)                                                      | 87.616(6)                                                      |
| Volume (Å <sup>3</sup> )            | 1590.2(2)                                                      | 3094.5(4)                                                      | 2400.8(4)                                                      |
| Density (calc) (g/cm <sup>3</sup> ) | 1.244                                                          | 1.390                                                          | 1.338                                                          |
| μ (mm <sup>-1</sup> )               | 2.382                                                          | 0.279                                                          | 1.440                                                          |
| F (000)                             | 616.0                                                          | 1344.0                                                         | 1008.0                                                         |
| Radiation                           | Cu Kα (λ = 1.54184)                                            | Mo Kα (λ = 0.71073)                                            | Cu Kα (λ = 1.54184)                                            |



|                                                      |                                                           |                                                           |                                                           |
|------------------------------------------------------|-----------------------------------------------------------|-----------------------------------------------------------|-----------------------------------------------------------|
| Temperature (K)                                      | 293.2(2)                                                  | 292.4(4)                                                  | 293.15                                                    |
| Reflections collected                                | 10998                                                     | 51956                                                     | 17054                                                     |
| Independent reflections                              | 6230                                                      | 15355                                                     | 9408                                                      |
|                                                      | ( $R_{\text{int}}$ : 0.0567, $R_{\text{sigma}}$ : 0.0707) | ( $R_{\text{int}}$ : 0.1362, $R_{\text{sigma}}$ : 0.2456) | ( $R_{\text{int}}$ : 0.0738, $R_{\text{sigma}}$ : 0.1171) |
| GOF                                                  | 1.014                                                     | 0.902                                                     | 1.049                                                     |
| Final R indexes ( $I \geq 2\sigma(I)$ )              | $R_1 = 0.0545$ ,<br>$wR_2 = 0.1391$                       | $R_1 = 0.0846$ ,<br>$wR_2 = 0.1780$                       | $R_1 = 0.0690$ ,<br>$wR_2 = 0.1473$                       |
| Largest diff. peak and hole ( $e \text{ \AA}^{-3}$ ) | 0.28 / -0.27                                              | 0.20 / -0.28                                              | 0.41 / -0.33                                              |

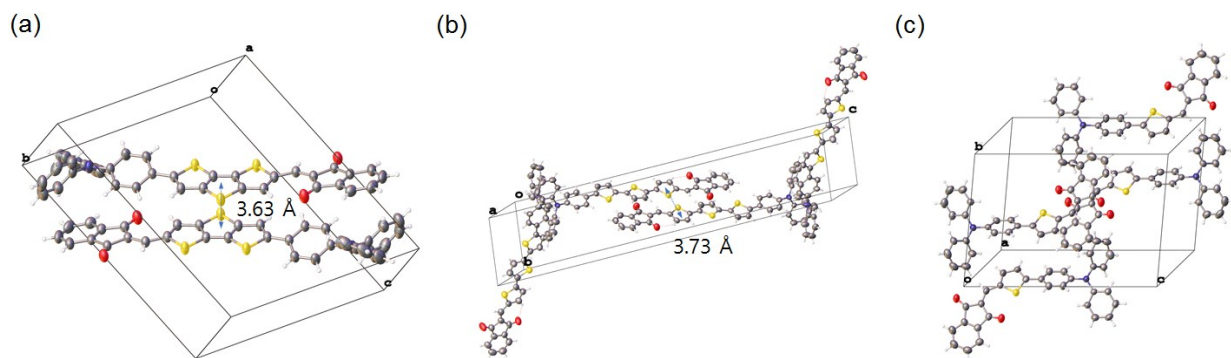

**Fig. S3.** Molecular packing structures of (a) **H1**, (b) **H2**, and (c) **H3**.

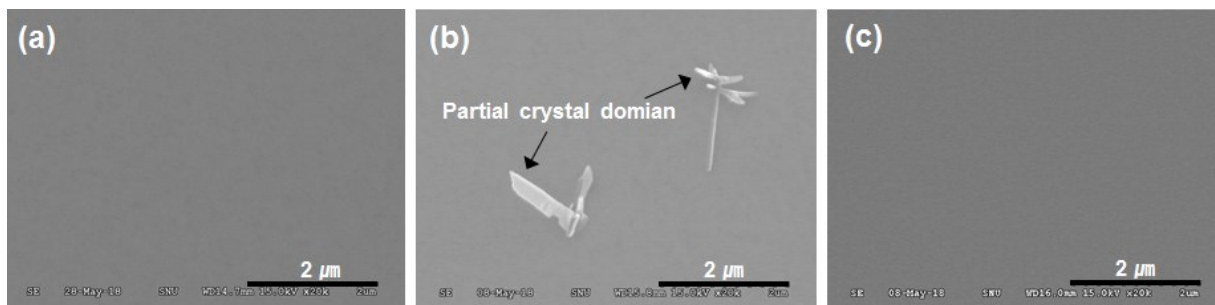

**Fig. S4.** SEM images of (a) H1, (b) H2, and (c) H3.

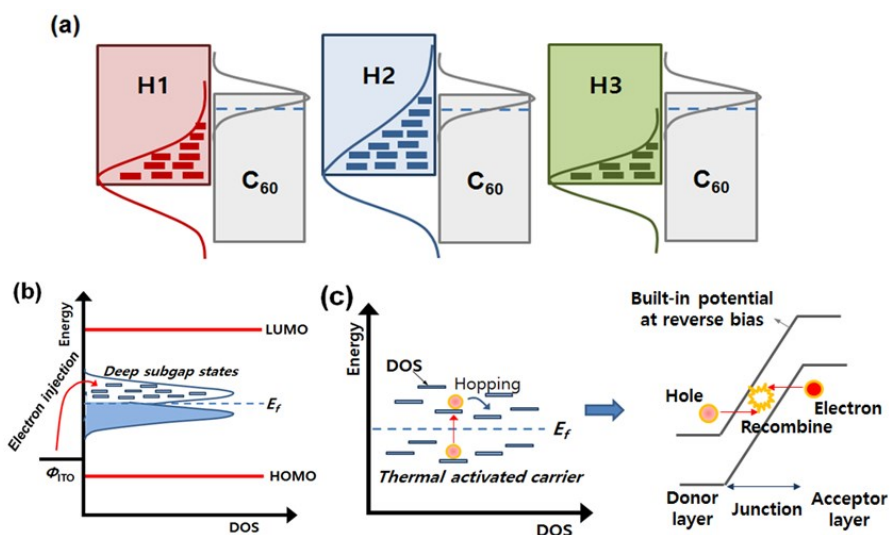

**Fig. S5.** (a) Schematic views of density-of-states of donor molecules, (b) and (c) plausible dark current mechanism of OPD devices at reverse bias.<sup>3,4</sup>

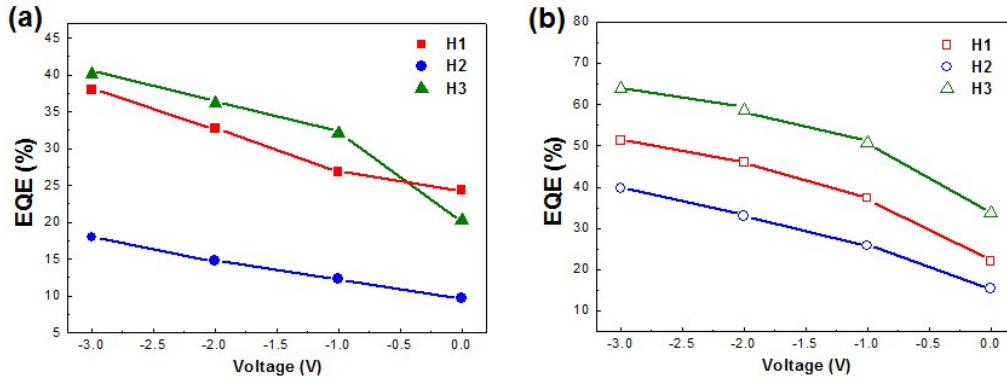

**Fig. S6.** EQE<sub>max</sub> values (a) PJH and (b) BHJ devices under reverse bias

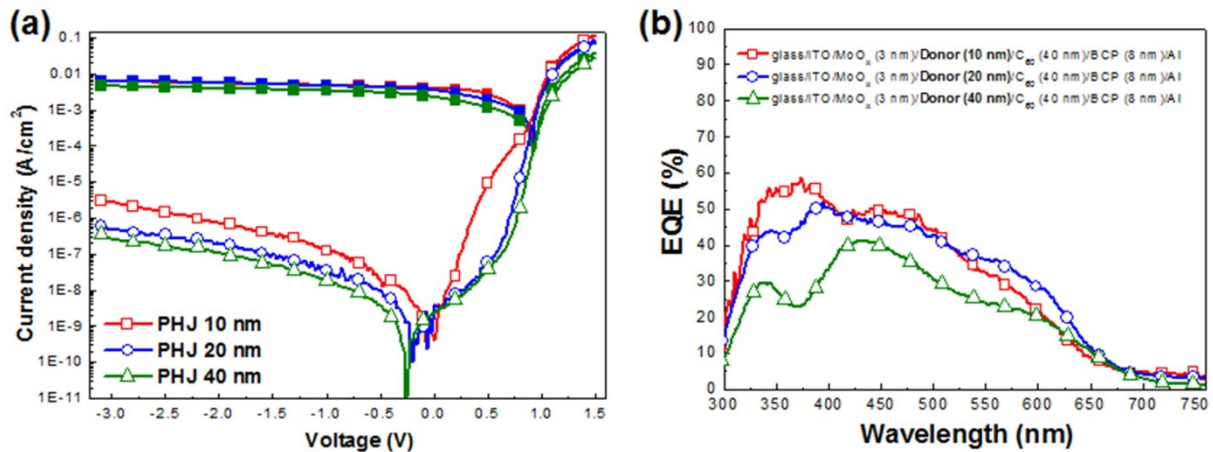

**Fig. S7.** (a)  $J$ - $V$  characteristics of H1-based PHJ devices under dark conditions (filled symbol lines) and under white light (open symbol lines) conditions and (b) EQE spectra at  $-3$  V. (rectangle: 10 nm of donor layer thickness, circle: 20 nm of donor layer thickness, triangle: 40 nm of donor layer thickness)

**Table S3.** Performance of the OPD devices based on **H1** according to the active layer thickness

| @ -3 V | Thickness    | $J_{d, best}$        | $J_d$                | $J_{ph}$             | $D^*$                    | $EQE$ (%) |
|--------|--------------|----------------------|----------------------|----------------------|--------------------------|-----------|
|        | (nm)         | (A/cm <sup>2</sup> ) | (A/cm <sup>2</sup> ) | (A/cm <sup>2</sup> ) | (cmHz <sup>1/2</sup> /W) | (@530 nm) |
|        | <b>10 nm</b> | $1.4 \times 10^{-6}$ | $2.6 \times 10^{-6}$ | $6.1 \times 10^{-3}$ | $0.7 \times 10^{11}$     | 36.7      |
| PHJ    | <b>20 nm</b> | $6.7 \times 10^{-8}$ | $5.1 \times 10^{-7}$ | $6.4 \times 10^{-3}$ | $2.2 \times 10^{11}$     | 38.0      |
|        | <b>40 nm</b> | $2.5 \times 10^{-8}$ | $1.5 \times 10^{-7}$ | $4.5 \times 10^{-3}$ | $2.1 \times 10^{11}$     | 26.5      |

All PHJ devices were deposited by vacuum thermal evaporation. All devices consist of glass/ITO/MoO<sub>3</sub>(3 nm)/**H1** (X nm)/C<sub>60</sub> (40 nm)/BCP (8 nm)/Al.

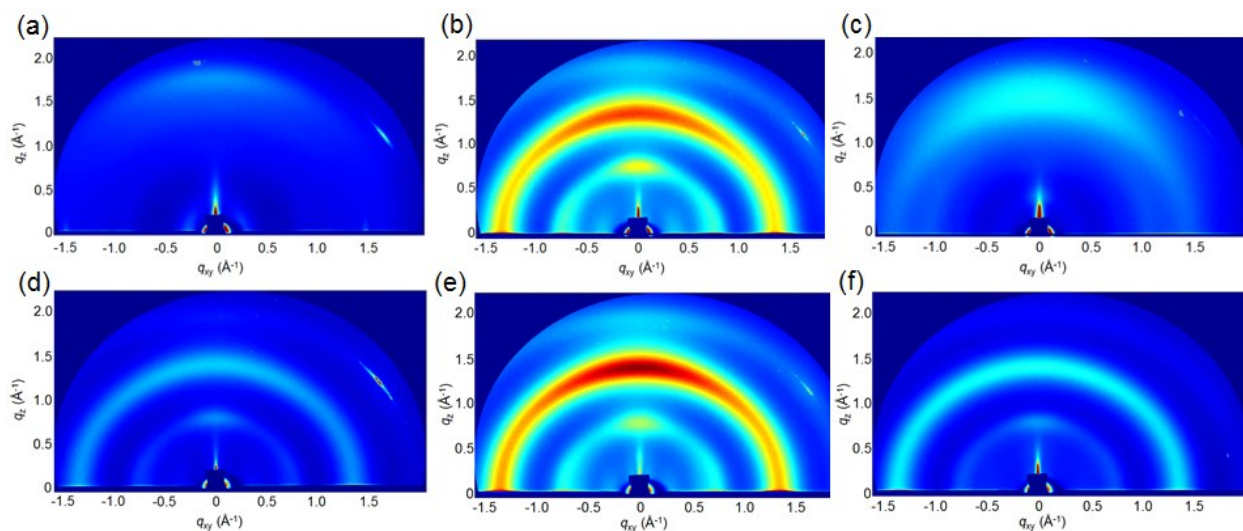

**Fig. S8.** 2D GIWAXS patterns of neat thin films of (a) **H1**, (b) **H2**, and (c) **H3**, and blend thin films of (d) **H1**:C<sub>60</sub> (1:1), (e) **H2**:C<sub>60</sub> (1:1), and (f) **H3**:C<sub>60</sub> (1:1).

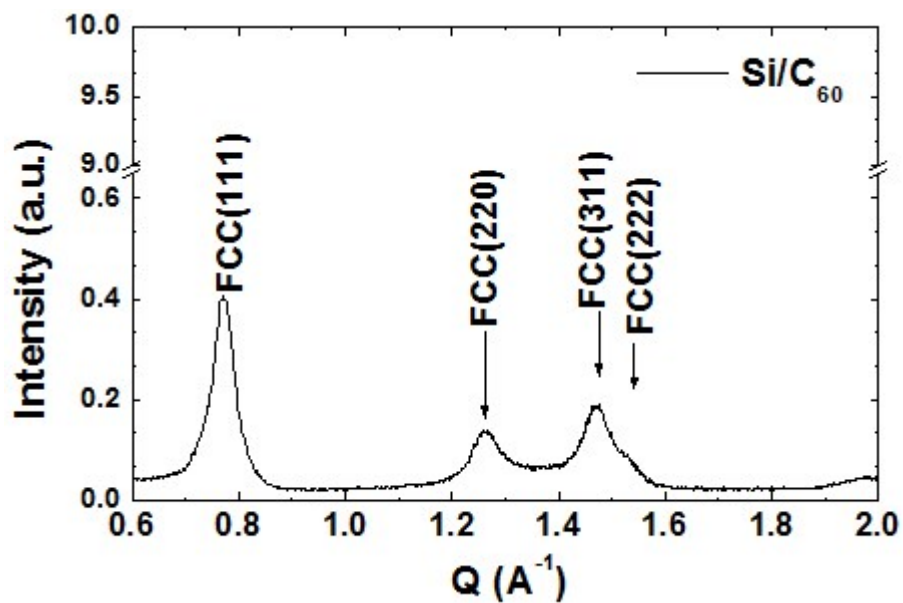

**Fig. S9.** Grazing incidence wide-angle X-ray scattering (GIWAXS) pattern of the C<sub>60</sub> thin film (40 nm) on Si substrate. The incident angle is 0.15°.

#### REFERENCES

- (1) J. Frey, A. D. Bond, and A. B. Holmes, *Chem. Commun.*, 2002, **0**, 2424–2425.
- (2) J.-I. Fujisawa, *Phys. Chem. Chem. Phys.*, 2015, **1**, 12228–12237.
- (3) H. Shekhar, O. Solomeshch, D. Liraz and N. Tessler, *Appl. Phys. Lett.*, 2017, **111**, 223301-223301-4.
- (4) K. Kawano and C. Adachi, *Adv. Funct. Mater.*, 2009, **19**, 3934-3940.
